# Supplementary material
Source: MDPI journal article supplement (https://www.mdpi.com/2076-0760/5/3/31)
Supplement: s1 [file s1]

# Supplementary Materials: Worksheet for Describing and Categorizing a Genocidal Event: A New Tool for Assembling More Objective Data and Classifying Events of Mass Killing

Israel W. Charny

Israel Charny's Worksheet for Describing & Categorizing a Genocidal Event: *Data Collection & Analysis of Genocides in Multiple Sub-Categories*

Name of Researcher and/or Research Group \_\_\_\_\_ Date \_\_\_\_\_  
 Researcher's Age \_\_\_\_\_ Gender \_\_\_\_\_ Nationality \_\_\_\_\_ Ethnicity/Religion \_\_\_\_\_ Geographical Location \_\_\_\_\_  
 Researcher's Basic Concept of Genocide \_\_\_\_\_

**Instructions:** The Worksheet is not intended to be read vertically. Each horizontal row provides examples of the dimension being studied, but no significance or clustering of vertical columns is intended. When using this Worksheet, print each row on a separate page so that there is much more room for fact-gathering and interpretation by each researcher (a format of one row to a page is available on request to the author). The concept of a "Worksheet" is intended to convey an invitation to all scholars to edit, add, or expand the present Worksheet when assembling the facts of any given genocide, and also to propose structural changes in the basic model. **Check off one or more categories as apply and add alternative concepts according to your judgment. Attach explanatory notes including references to source materials and to existing professional publications.**

## Part I: ASSEMBLING DATA ABOUT AN EVENT OF MASS KILLING without reference to categorizing the event

|    |                                          | A                               | B                                    | C                                                                                                                | D                                                                                         | E                                                                                                                                                      | F                                                                                              | G                                                                                                                  | H                                                                                                                      | I                                                             | J                                                                                                                         |
|----|------------------------------------------|---------------------------------|--------------------------------------|------------------------------------------------------------------------------------------------------------------|-------------------------------------------------------------------------------------------|--------------------------------------------------------------------------------------------------------------------------------------------------------|------------------------------------------------------------------------------------------------|--------------------------------------------------------------------------------------------------------------------|------------------------------------------------------------------------------------------------------------------------|---------------------------------------------------------------|---------------------------------------------------------------------------------------------------------------------------|
| 1. | GENOCIDAL INTENT (OBJECTIVE) & PROCESS-- | "Intentional Genocide"<br>Total | "Intentional Genocide"<br>Partial    | Implied or Emergent Intentionality of Genocide including genocide inferred from facts/actions seen on the ground | Not Intentional Genocide<br><br>e.g., Genocide as Crimes against Humanity or Manslaughter | OTHER CONCEPTS<br>-"Humanicide";<br>-"Democide";<br>"Atrocity Crimes";<br>-"Highly Violent Societies"<br>-Ethnic cleansing<br>-Genocidal Manslaughter" | "Accomplices to Genocide"<br>-"Conspiracy to Commit Genocide"<br>-"Facilitating Genocidal Act" | -Genocide by Attrition<br>-Genocide as a Result of Environmental or Ecological Destruction and Abuse<br>-"Ecocide" | Mass Killing<br>-Territorial<br>- Religious<br>-Political<br>"Politicide"<br>- Ideological<br>- Other Power Domination | -Killing for killing's sake<br>- "Necrophilia"<br>-Other      | "Cultural Genocide"<br>- Ethnocide<br>- Biological<br>- Physical<br>- Economic<br>- Religious<br>- Social<br>- Linguicide |
| 1a | Commanding Agency                        |                                 | including -                          |                                                                                                                  |                                                                                           |                                                                                                                                                        |                                                                                                |                                                                                                                    |                                                                                                                        |                                                               |                                                                                                                           |
| 1b | -Unfolding Progression                   |                                 | -Genocidal Massacres                 |                                                                                                                  |                                                                                           |                                                                                                                                                        |                                                                                                |                                                                                                                    |                                                                                                                        |                                                               |                                                                                                                           |
| 2a | -Specific Target                         |                                 | -Test' Massacre to Consolidate Power |                                                                                                                  |                                                                                           |                                                                                                                                                        |                                                                                                |                                                                                                                    |                                                                                                                        |                                                               |                                                                                                                           |
| 2b | -Multiple Genocide" or "Omnicide"        |                                 |                                      |                                                                                                                  |                                                                                           |                                                                                                                                                        |                                                                                                |                                                                                                                    |                                                                                                                        |                                                               |                                                                                                                           |
| 2. | TARGETED VICTIM GROUP                    | Racial                          | Religious                            | Ethnic                                                                                                           | Political "Politicide"                                                                    | Gender "Gendercide"                                                                                                                                    | Sexual Preference                                                                              | -Enemy Civilians in War<br>-Expendable Civilians Own People , e.g., Iran's use children mine detectors             | -Membership in Collectivity<br>-Children and Babies                                                                    | Random<br>- Concealing Intentional Target<br>- Indiscriminate | Other<br>-Intellectuals or any form of 'People Wearing Glasses'<br>-Any (insane) Differentiation                          |

|    |                                                                                                                                |                                                                                                                                                           |                                                                                                                                   |                                                                                             |                                                       |                                                             |                                                                                    |                                                          |                                                                                         |                                                                                                            |                                                                                                 |
|----|--------------------------------------------------------------------------------------------------------------------------------|-----------------------------------------------------------------------------------------------------------------------------------------------------------|-----------------------------------------------------------------------------------------------------------------------------------|---------------------------------------------------------------------------------------------|-------------------------------------------------------|-------------------------------------------------------------|------------------------------------------------------------------------------------|----------------------------------------------------------|-----------------------------------------------------------------------------------------|------------------------------------------------------------------------------------------------------------|-------------------------------------------------------------------------------------------------|
| 3. | MEANS OF GENOCIDE                                                                                                              | Execution by Hand or Contact Weapons                                                                                                                      | -Death Camps<br>- Concentration Camps,<br>-Gulag,<br>-Labor Camps<br>-Prisons<br>-Other                                           | Forced March<br>Deportation or Transfer                                                     | -Famine<br>-Attrition                                 | Medical Killing                                             | -Mass Killing,<br>-Gas Chambers<br>-Mass Graves<br>-Dedicated Crematoria<br>-Other | Bombing<br>- Conventional<br>- Saturation                | -Transnational 'Genocidal Terrorism<br>-Suicide Bombing (designate location);<br>-Other | WMD = Weapons of Mass Destruction<br>- Nuclear<br>- Biological<br>- Chemical<br>--Other Futuristic Weapons | Other<br>-Rape<br>-Preventing births<br>-New WMD (specify)<br>-Planetocide<br>-Random Terrorism |
| 4. | CONTEXT<br><br>ORGANIZING AIMS & THEMES<br><br>INSPIRATION<br>IMAGOS                                                           | -Dehuman-ization and Demonization<br>-Ideological Domination<br>"Purifying"<br>-Ethnic<br>-Religious<br>-Political<br>-Economic<br>- Utopianism<br>-Other | Genocide in an Aggressive<br><b>Unjust War</b><br>of Invasion, Expansion or Domination<br>-Crimes against Humanity<br>-War Crimes | Genocide in a <b>Just War</b><br>of Self-Defense<br>-Crimes against Humanity<br>-War Crimes | Genocidal Terrorism<br>- National<br>- Trans-national | Colonization<br>"Indigenocide"<br>or Consolidation of Power | Revolution                                                                         | Revenge<br>"Retributive"<br>(Fein) and/or Mutual Killing | Globalization, Industrial Development, or Resource Mining                               | -Youth Bulge<br><i>an emerging potential cause</i><br>-Sexual Identity                                     | -Killing for killing's sake<br>-Other                                                           |
| 5. | IDENTITY OF PERPETRATOR<br><br><i>Roles in Perpetrating Genocide:</i>                                                          | Government                                                                                                                                                | Political Party                                                                                                                   | Church                                                                                      | Revolutionaries                                       | Terrorists                                                  | Current Victim People Retaliating                                                  | Past Victim People Retaliating                           | Military Paramilitary Police , i.e., "Special" or "Secret" Forces                       | Crowd or "the People"                                                                                      | Other                                                                                           |
| 5a | - PERPETRATORS                                                                                                                 | -----                                                                                                                                                     | -----                                                                                                                             | -----                                                                                       | -----                                                 | -----                                                       | -----                                                                              | -----                                                    | -----                                                                                   | -----                                                                                                      | -----                                                                                           |
| 5b | S                                                                                                                              | -----                                                                                                                                                     | -----                                                                                                                             | -----                                                                                       | -----                                                 | -----                                                       | -----                                                                              | -----                                                    | -----                                                                                   | -----                                                                                                      | -----                                                                                           |
| 5c | -ACCOMPLICES<br><br>-BYSTANDERS (groups & individuals)<br><br>Specify each of above -<br>-Within Region<br><br>-Outside Region | -----                                                                                                                                                     | -----                                                                                                                             | -----                                                                                       | -----                                                 | -----                                                       | -----                                                                              | -----                                                    | -----                                                                                   | -----                                                                                                      | -----                                                                                           |

| 6. | OUTCOME                                                                          | Largely or<br>Essentially<br>Total<br>Extinction | Substantial<br>Extinction | Substantial<br>Murders | <i>"Genocidal<br/>Massacre"</i><br>(Kuper),<br>Pogrom | Deportation,<br>Transfer,<br>Exile | Other |       |       |       |       |
|----|----------------------------------------------------------------------------------|--------------------------------------------------|---------------------------|------------------------|-------------------------------------------------------|------------------------------------|-------|-------|-------|-------|-------|
| 6a | Numbers Killed                                                                   | -----                                            | -----                     | -----                  | -----                                                 | -----                              | ----- |       |       |       |       |
| 6b | Percentage Of<br>Group                                                           | -----                                            | -----                     | -----                  | -----                                                 | -----                              | ----- |       |       |       |       |
| 6c | Time Span of<br>Extermination                                                    | -----                                            | -----                     | -----                  | -----                                                 | -----                              | ----- |       |       |       |       |
| 7. | RESPONSES TO<br>GENOCIDE<br><b>(Identify the<br/>subject in each<br/>column)</b> | _____                                            | _____                     | _____                  | _____                                                 | _____                              | _____ | _____ | _____ | _____ | _____ |
|    | a) Intervention                                                                  | -----                                            | -----                     | _____                  | _____                                                 | _____                              | _____ | _____ | _____ | _____ | _____ |
|    | b) "Righteous"<br>"Rescuers"                                                     | _____                                            | _____                     | _____                  | _____                                                 | _____                              | _____ | _____ | _____ | _____ | _____ |
|    | c) Opposition                                                                    | _____                                            | _____                     | _____                  | _____                                                 | _____                              | _____ | _____ | _____ | _____ | _____ |
|    | d) Indifference<br>& Allowance<br>[overlaps 5c]                                  | _____                                            | _____                     | _____                  | _____                                                 | _____                              | _____ | _____ | _____ | _____ | _____ |
|    | Specify each of<br>above -<br>-Within Region                                     |                                                  |                           |                        |                                                       |                                    |       |       |       |       |       |
|    | -Outside<br>Region                                                               |                                                  |                           |                        |                                                       |                                    |       |       |       |       |       |

|    |                                                                                    |  |  |  |  |  |  |  |  |  |  |
|----|------------------------------------------------------------------------------------|--|--|--|--|--|--|--|--|--|--|
| 8. | SPECIFY<br>OTHER<br>IMPORTANT<br>CHARACTER-<br>ISTICS OF THE<br>GENOCIDAL<br>EVENT |  |  |  |  |  |  |  |  |  |  |
|----|------------------------------------------------------------------------------------|--|--|--|--|--|--|--|--|--|--|

**Part II: JUDGMENTS: CATEGORIZING A GENOCIDAL EVENT**

*These are judgments made by a specific analyst. Identify below more fully your feelings about your working definition of genocide and describe what you know to be your basic values about genocide.*

*More about My Basic Working Definition of Genocide* \_\_\_\_\_

*Basic Values about Genocide* \_\_\_\_\_

|     |                                                                                                                                                                            | A                                      | B                                                  | C                                      | D                                      | E                                   | F                                                | G                                                                                                                               | H                                                                                                                                            | I                            | J |
|-----|----------------------------------------------------------------------------------------------------------------------------------------------------------------------------|----------------------------------------|----------------------------------------------------|----------------------------------------|----------------------------------------|-------------------------------------|--------------------------------------------------|---------------------------------------------------------------------------------------------------------------------------------|----------------------------------------------------------------------------------------------------------------------------------------------|------------------------------|---|
| 9.  | <b>AXIS I:</b><br><br><b>CLASSIFI-<br/>CATION OF<br/>GENOCIDE IN<br/>INTELLECTUAL,<br/>POLITICAL &amp;<br/>SOCIAL SCIENCE<br/>LANGUAGE</b>                                 | <b>Intentional<br/>Genocide</b>        | <b>Some Degree<br/>of Intentional<br/>Genocide</b> | <b>Ethnic<br/>Cleansing</b>            | <b>Crimes<br/>Against<br/>Humanity</b> | <b>Politicide</b>                   | <b>Ecocide</b>                                   | <b>Mass Murder<br/>-Targeted<br/>-Targeted<br/>with<br/>Indifferent<br/>Randomness<br/>-Random<br/>within<br/>Larger Target</b> | <b>Cultural<br/>Genocide<br/>-Mental Harm<br/>-Life<br/>Conditions<br/>Bringing<br/>Destruction<br/>-Preventing<br/>Births<br/>-Transfer</b> |                              |   |
| 10. | <b>AXIS II:</b><br><br><b>CLASSIFICATION<br/>OF LEGAL<br/>DEGREE OF<br/>RESPONSIBILITY*</b><br><i>Please name your<br/>specific legal<br/>framework:</i><br>_____<br>_____ | <i>"First<br/>Degree<br/>Genocide"</i> | <i>"Second<br/>Degree<br/>Genocide"</i>            | <i>"Third<br/>Degree<br/>Genocide"</i> | <b>Crimes<br/>Against<br/>Humanity</b> | <b>Genocide as<br/>Manslaughter</b> | <i>"Accomplice<br/>to Genocide"<br/>(Charny)</i> | <b>Attempted<br/>Genocide</b>                                                                                                   | <b>No Criminal<br/>Responsi-bility</b>                                                                                                       | <b>Cultural<br/>Genocide</b> |   |

\* Raphael Lemkin is, of course, the originator of the concept of genocide. The above classification is based largely on prevailing legal usage under the *U.N. Genocide Convention* pioneered by Lemkin, and as it is since interpreted and expanded by international courts, including ICTR, ICTY, ICJ, ICC, and the European Court of Human Rights. The concepts of degrees of genocide, comparable to degrees of murder, are taken from a proposal advanced, first by Ward Churchill in *Alternatives*, 1986.

In the endnotes of this paper, the reader will find a group of selected references to many of the concepts that appear in this Worksheet; in many cases these references are to the original publication in which the concept was first introduced. (It is obviously impossible to give all the references since these embody the entire literature of genocide studies.)

© July 7, 2016 Institute on the Holocaust and Genocide. Revised in response to feedback with special thanks to Professors Samuel Totten, Michael Bazyler, and Henry Theriault; © Revised for Presentation to First International Conference of Open University of Israel for the Study of Holocaust and Genocide, November 2014; © Revised for Publication in GPN GENOCIDE PREVENTION NOW, Issue 12 ([www.genocidepreventionnow.org](http://www.genocidepreventionnow.org)) November 2012; © Revised for Presentation to International Society of Political Psychology, Paris, July 2008; © Revised for Presentation at Congress at University of Buenos Aires, November 2007; © Revised Presentation to Seminar at Hiroshima City University, Hiroshima, Japan, March 2004; © First draft originally presented to International Association of Genocide Scholars in Galway, Ireland, June 2003.
